# Supplementary material for: A Prospective Study on the Influence of Scholastic Factors on the Prevalence and Initiation of Illicit Drug Misuse in Adolescence
Source: MDPI journal article supplement (doi:10.3390/ijerph15050874), 2018-04-27
Supplement: s1 [file s1]

### Supplementary Materials

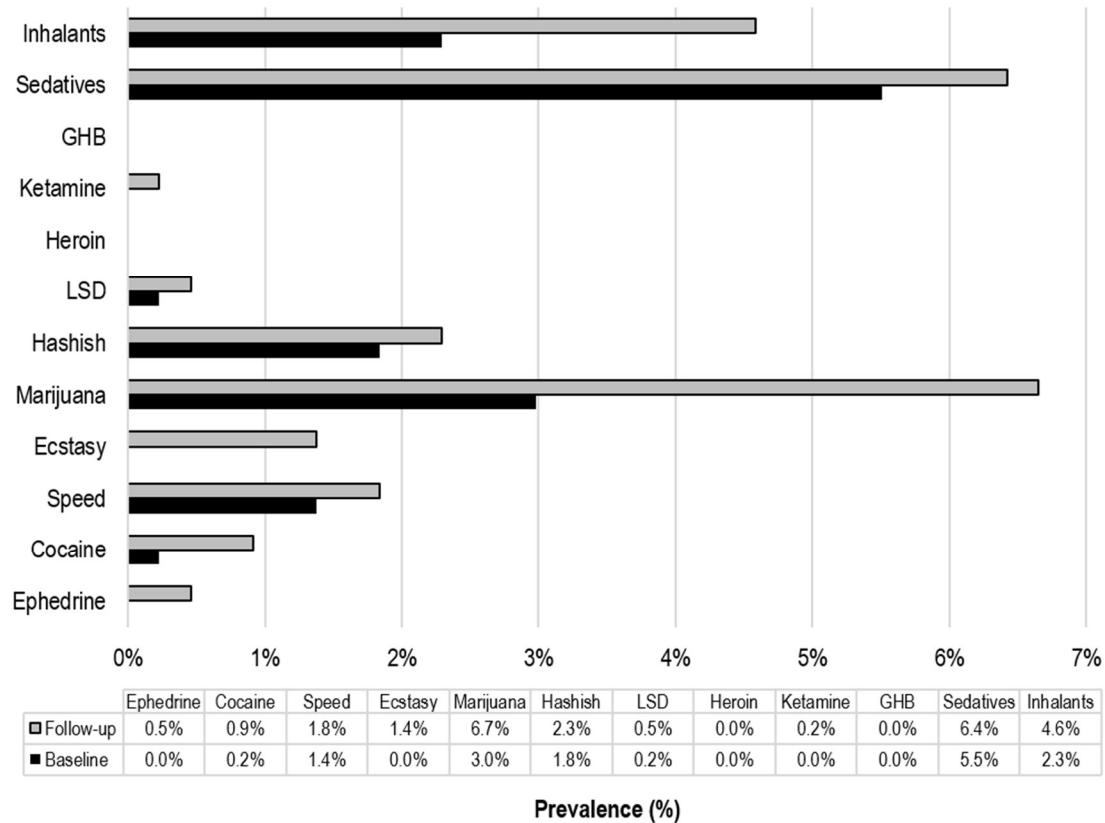

**Figure S1.** Prevalence of illicit drug misuse at study baseline and follow-up.

**Table S1.** Attrition bias analysis between responders and non-responders on a basis of illicit drug use at baseline and gender.

|                                | Responders | Non-Responders | Chi Square (p) |
|--------------------------------|------------|----------------|----------------|
| Illicit drug users             |            |                |                |
| Males                          | 8          | 2              | 0.63           |
| Females                        | 11         | 1              | (0.42)         |
| Illicit drug nonusers          |            |                |                |
| Males                          | 222        | 19             | 5.92           |
| Females                        | 191        | 5              | (0.02)         |
| Subtotal illicit drug users    | 19         | 3              | 2.51           |
| Subtotal illicit drug nonusers | 413        | 24             | (0.11)         |
| Subtotal males                 | 230        | 21             | 6.17           |
| Subtotal females               | 202        | 6              | (0.01)         |
| Total                          | 432        | 27             |                |

Note that group of non-responders for this analysis does not include participants who were not present at the baseline testing (38 adolescents) and 4 participants who did not specify gender.
